# Supplementary material
Source: MDPI journal article supplement (https://www.mdpi.com/2073-4352/11/10/1151)
Supplement: s1 [file s1]

## Article

# Multi-component Crystals of 2,2'-Bipyridine with Aliphatic Dicarboxylic Acids: Melting Point-Structure Relations

Vhukhudo Nethanani and Eustina Batisai \*

Department of Chemistry, Faculty of Science, Engineering and Agriculture, University of Venda, P. Bag X5050, Thohoyandou 0920, South Africa; nethananiv@gmail.com

\* Correspondence: Eustina.Batisai@univen.ac.za

**Citation:** Nethanani, V.; Batisai, E. Multicomponent Crystals of 2,2'-Bipyridine with Aliphatic Dicarboxylic Acids: Melting Point-Structure Relations. *Crystals* **2021**, *11*, 1151.  
<https://doi.org/10.3390/cryst11101151>

Academic Editor(s): Alberto Girlando

Received: 11 August 2021

Accepted: 14 September 2021

Published: 22 September 2021

**Publisher's Note:** MDPI stays neutral with regard to jurisdictional claims in published maps and institutional affiliations.

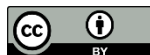

**Copyright:** © 2021 by the authors. Licensee MDPI, Basel, Switzerland. This article is an open access article distributed under the terms and conditions of the Creative Commons Attribution (CC BY) license (<http://creativecommons.org/licenses/by/4.0/>).

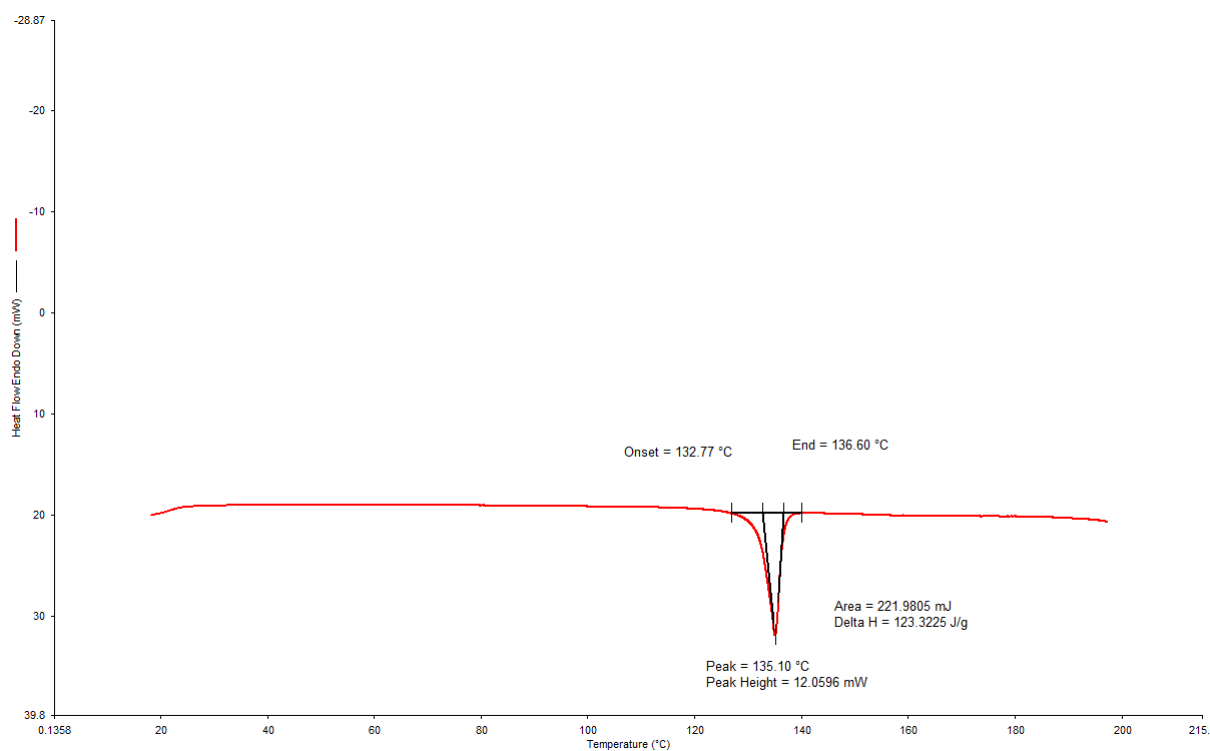

Figure S1. DSC thermogram of BPY H<sup>+</sup>·OXA<sup>-</sup>.

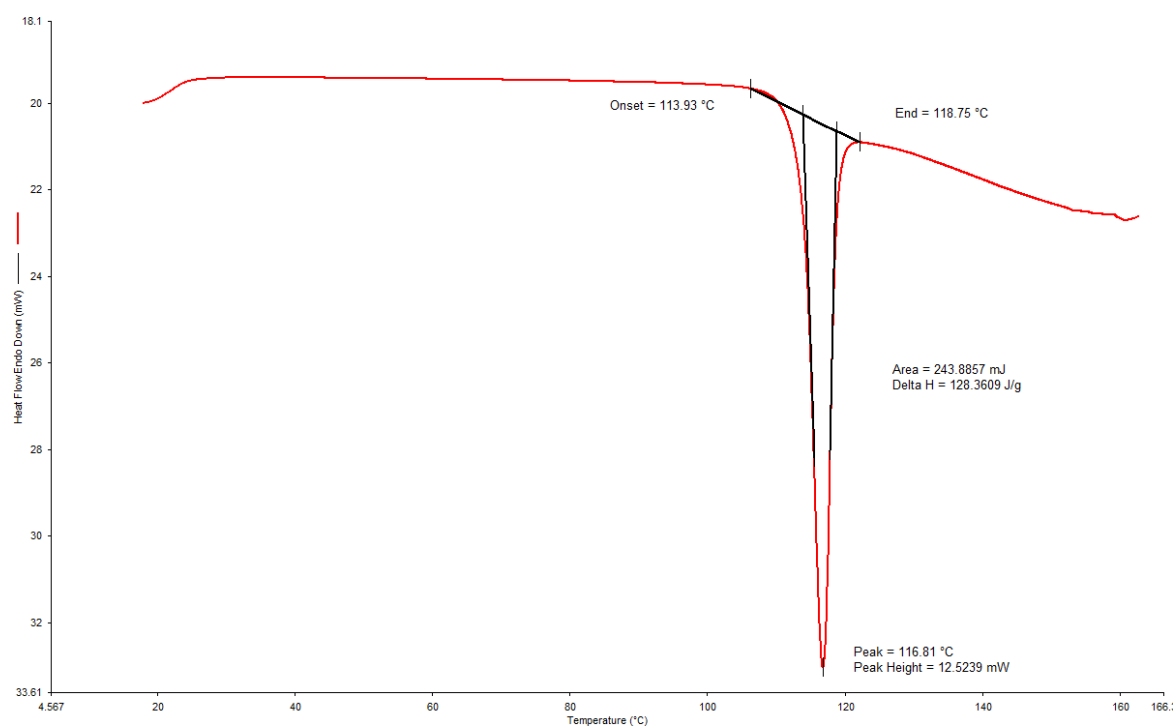

Figure S2. DSC thermogram of BPY 2H<sup>+</sup>·2MAL<sup>-</sup>.

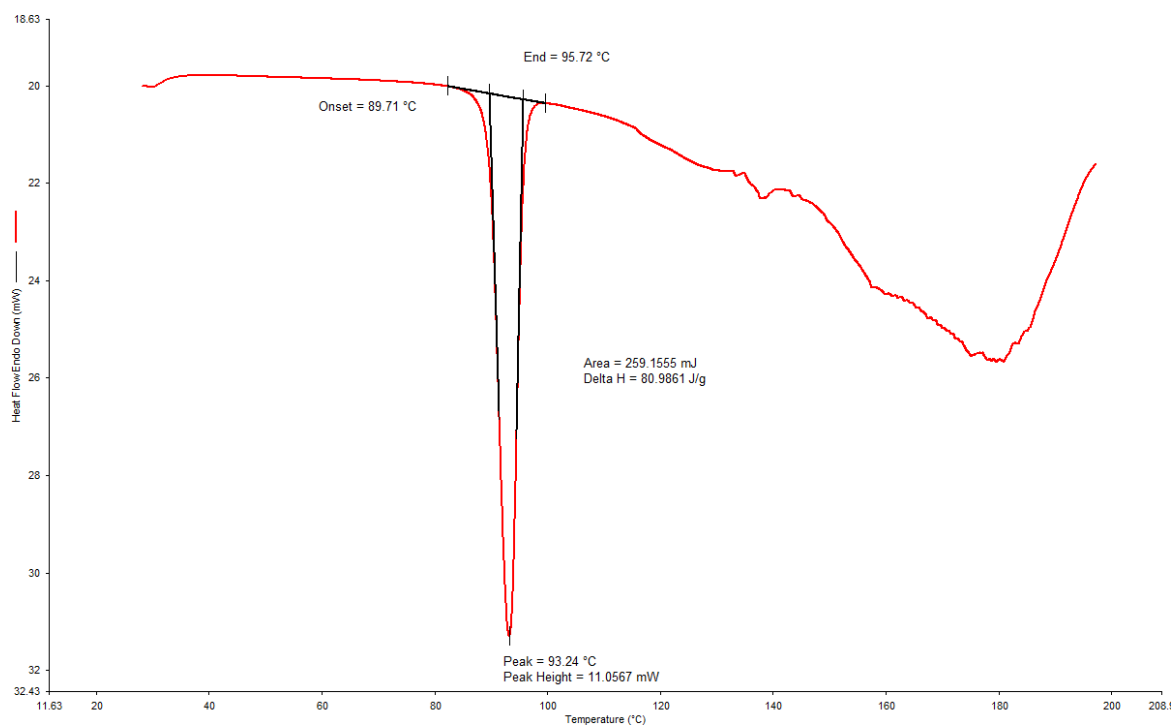

Figure S3. DSC thermogram of BPY-SUC.

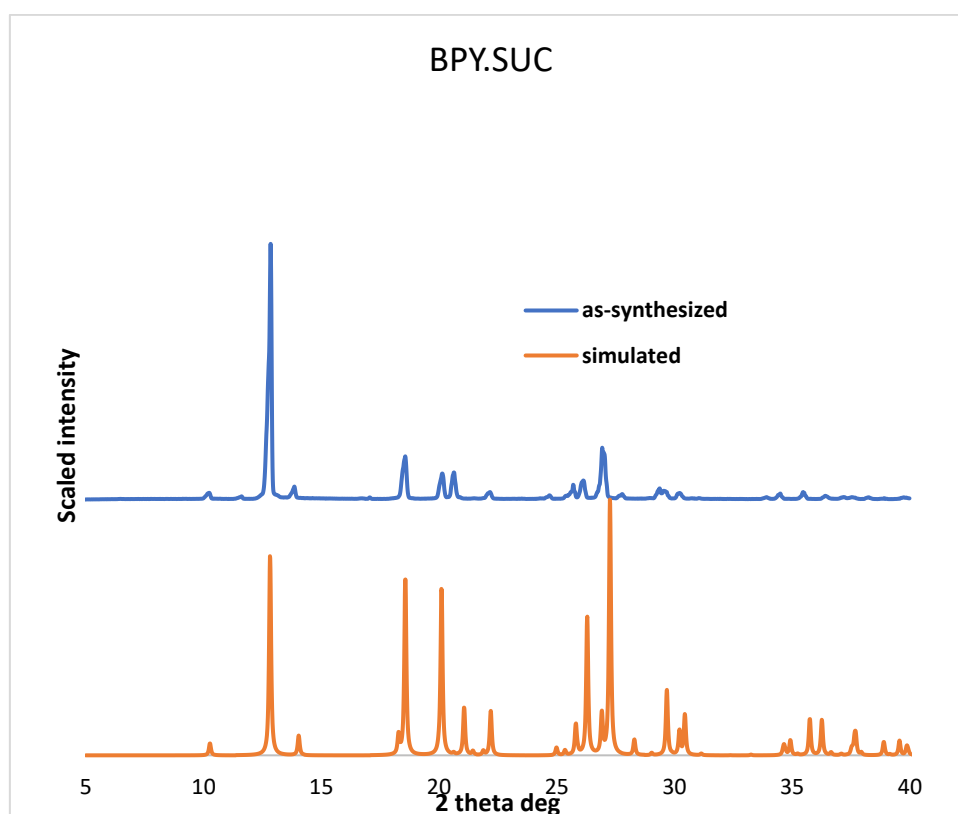

Figure S4. PXRD patterns for simulated and as-synthesized BPY-SUC.

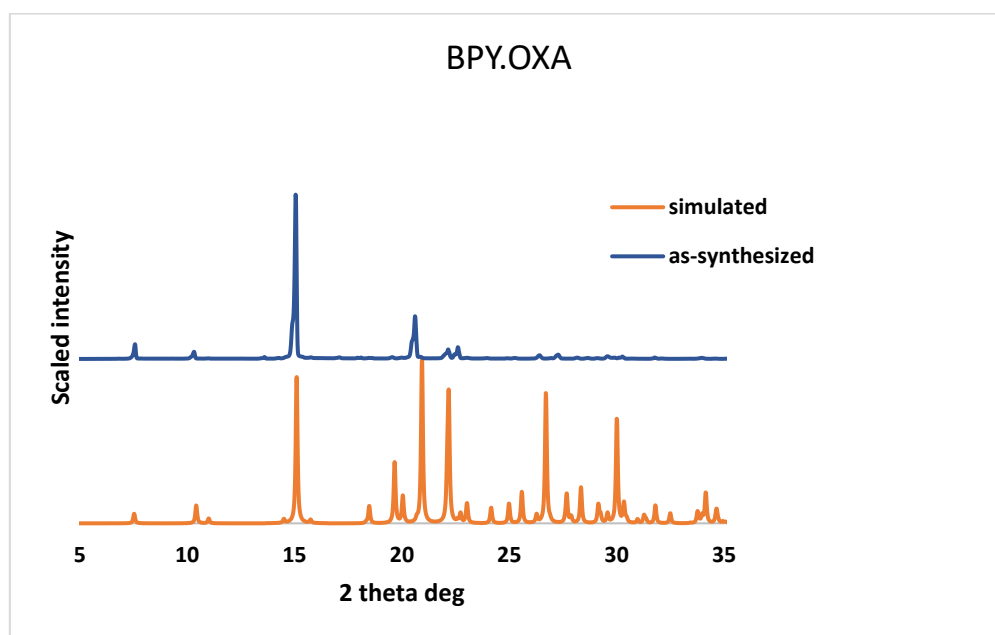

Figure S5. PXRD patterns for simulated and as-synthesized  $\text{BPY H}^+\cdot\text{OXA}^-$ .

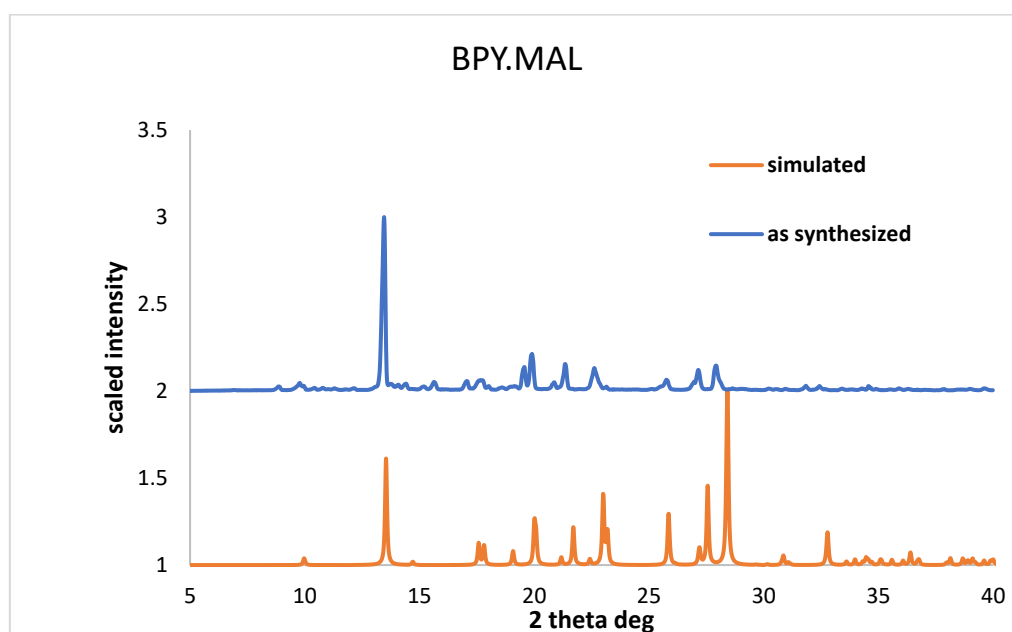

Figure S6. PXRD patterns for simulated and as-synthesized  $\text{BPY } 2\text{H}^+\cdot 2\text{MAL}^-$ .

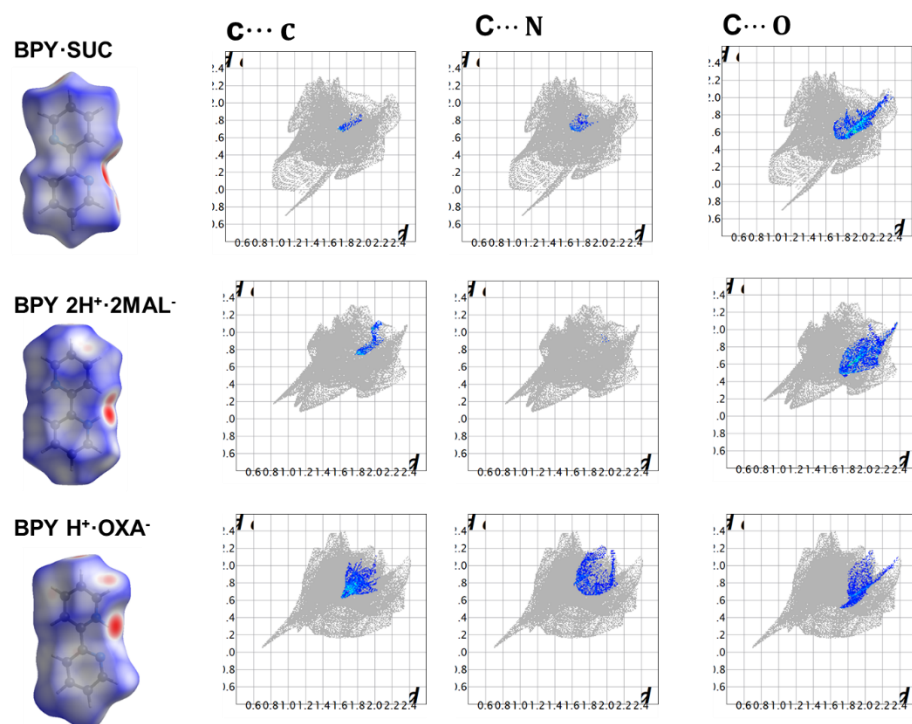

**Figure S7.** 2D fingerprint plots of BPY·SUC, BPY 2H<sup>+</sup>·2MAL<sup>-</sup> and BPY H<sup>+</sup>·OXA<sup>-</sup> showing the C...C, C...N and C...O interactions.

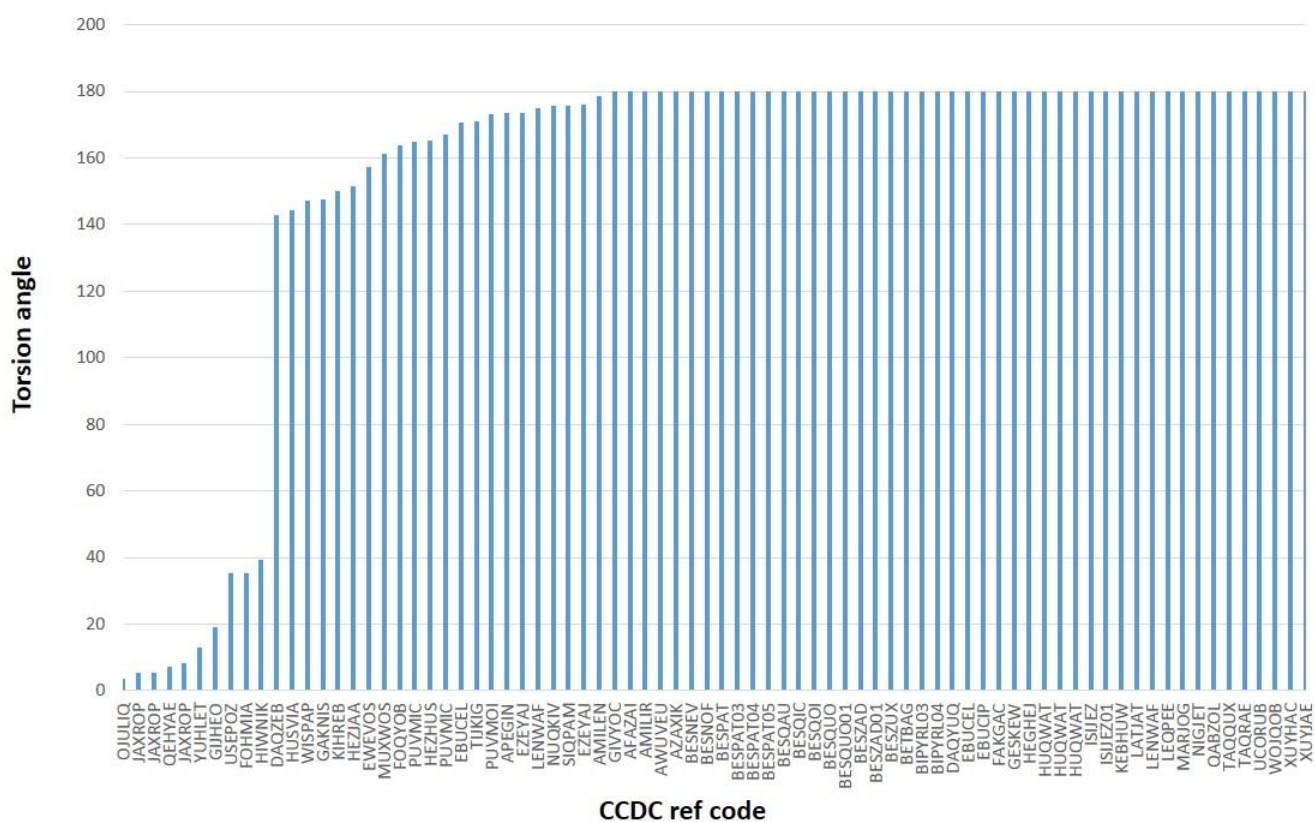

**Figure S8.** Results of CSD search on the BPY molecule.

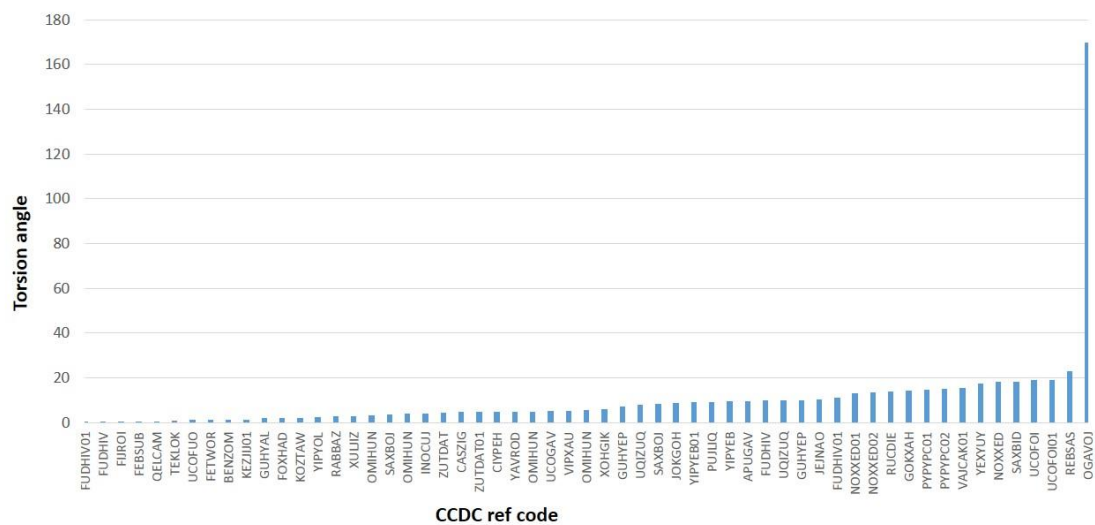

Figure S9. Results of CSD search on monoprotonated BPY.

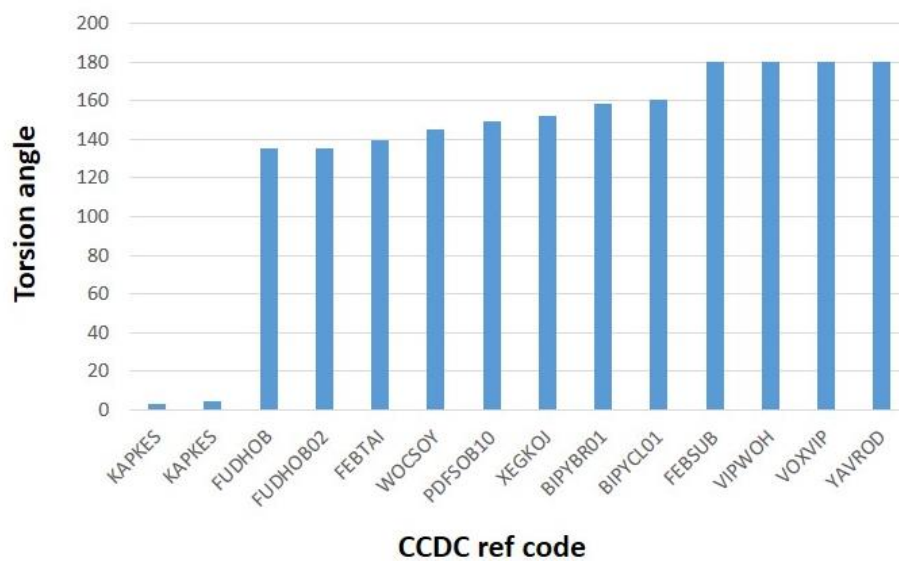

Figure S10. Results of CSD analysis on diprotonated BPY.
